1 Characterization of novel competitive inhibitors of *P. falciparum* cGMP-dependent protein kinase

2  
3 Tyler Eck,<sup>1,&</sup> Mariana Laureano de Souza,<sup>2,&</sup> Rammohan R. Yadav Bheemanaboina,<sup>1</sup> Ramappa  
4 Chakrasali,<sup>1</sup> Tamara Kreiss,<sup>1</sup> John J. Siekierka,<sup>1</sup> David P. Rotella,<sup>1</sup> Purnima Bhanot,<sup>2,\*</sup> Nina M.  
5 Goodey<sup>1,\*</sup>

6  
7 <sup>1</sup>Department of Chemistry and Biochemistry, Montclair State University, Montclair, NJ 07043,  
8 USA.

9 <sup>2</sup> Department of Microbiology, Biochemistry and Molecular Genetics, Rutgers New Jersey  
10 Medical School, Newark, NJ 07103

11 &These authors contributed equally to this manuscript.

12 \*Co-corresponding authors.

13 Bhanot, P.: Phone: (973) 972-3273; E-mail: bhanotpu@njms.rutgers.edu

14 Nina M. Goodey: Phone: (973) 655 3410; E-mail: goodeyn@mail.montclair.edu

## 15 16 **Keywords**

17 *P. falciparum*, cGMP-dependent protein kinase, malaria, isoxazole, competitive inhibitor

## 18 19 20 **Abstract**

21 *P. falciparum* cGMP-dependent protein kinase (PfPKG) is an enticing anti-malarial drug target.  
22 Structurally novel isoxazole-based compounds were shown to be ATP competitive inhibitors of  
23 PfPKG. Isoxazoles **3** and **5** had  $K_i$  values of  $0.7 \pm 0.2$  and  $2.3 \pm 0.9$  nM, respectively, that are  
24 comparable to a known standard, 4-[2-(4-fluorophenyl)-5-(1-methylpiperidine-4-yl)-1H pyrrol-3-  
25 yl] pyridine ( $1.4 \pm 0.5$  nM). They also exhibited excellent selectivity for PfPKG over the human  
26 ortholog and the gatekeeper mutant T618Q PfPKG, which mimics the less accessible binding site  
27 of the human ortholog. The human ortholog's larger binding site volume was predicted to explain  
28 the selectivity of the inhibitors for the *P. falciparum* enzyme. Analogs **4** and **6** were at least 20-  
29 fold less potent compared to **3** and **5**, suggesting that removing the carbonyl group in **3** or altering  
30 the diethylamino moiety in **5** reduced affinity.

## 31 32 **Introduction**

33 Malaria, a mosquito-borne disease caused by the *Plasmodium* parasite, accounted for an estimated  
34 229 million cases and 409,000 deaths in 2019 alone. <sup>1</sup> Emerging parasite resistance to artemisinin  
35 combination therapy threatens the effectiveness of current programs to control the disease and  
36 requires the development of new anti-malarials to continue eradication efforts. <sup>2</sup> There is an unmet  
37 need for molecules with mechanisms of action that are different from currently-used drugs, as well  
38 as drugs that act on multiple parasite stages to provide effective treatment, chemoprotection,  
39 chemoprevention and eventual eradication of malaria. <sup>2</sup> An essential part of the mechanism of  
40 action is an understanding of molecular-level interactions between the protein target and ligand.  
41 This information can be experimentally derived and/or theoretically produced and often a  
42 combination of approaches is useful.

43  
44 cGMP-dependent protein kinase (PKG) was shown to be a potential chemotherapeutic target in  
45 *Plasmodium* and related parasites such as *E. tenella* and *T. gondii*.<sup>3-6</sup> *P. falciparum* PKG (PfPKG)  
46 and *P. berghei* PKG function is essential in multiple parasite stages where they control diverse

47 processes, including gametogenesis,<sup>7</sup> merozoite egress and invasion,<sup>8, 9</sup> and late-stage liver  
48 development.<sup>10</sup> In accordance with these functions, inhibition of PfPKG blocks parasite infectivity  
49 and development.<sup>3, 7-9</sup> PfPKG has a substantially different hydrophobic pocket compared to human  
50 PKG (hPKG), a differentiating feature that can provide selectivity.<sup>4, 5</sup> The ‘gatekeeper’ position of  
51 PfPKG is occupied by a Thr (Thr618) which has a shorter side chain compared to the Gln at the  
52 equivalent position in hPKG. Moreover, human kinases in general have a larger residue, often a  
53 Met, at the gatekeeper position.<sup>11</sup> Thus the ‘gatekeeper pocket’ next to the ATP binding pocket is  
54 accessible in PfPKG but not in human kinases, making it possible to design inhibitors where a part  
55 of the structure occupies the gatekeeper pocket that cannot be accessed in human kinases. These  
56 qualities have prompted development of PfPKG inhibitors that can safely treat and/or prevent  
57 infection. Baker and co-workers demonstrated success with imidazopyridine **1**, a potent, selective  
58 and orally bioavailable PfPKG inhibitor that cleared infection in a mouse model.<sup>12</sup> Its co-crystal  
59 structure with *P. vivax* PKG (PvPKG) revealed binding in the ATP pocket and indicated a  
60 competitive mode of inhibition of *Plasmodium* PKG.<sup>12</sup> These observations contributed to an  
61 increased emphasis on PfPKG as a potential anti-parasitic drug target.<sup>12</sup> Unfortunately, the  
62 imidazopyridine series suffers from genotoxicity issues<sup>13</sup> that substantially limit the value of the  
63 chemotype. Characterizing novel chemotypes against PfPKG is one way to address this liability.  
64 Characterization against PfPKG of such chemotypes requires a combination of experimental (i.e.  
65 mode of inhibition; *in vitro* enzymatic and cell-based assays, assessment of drug-like properties)  
66 and theoretical modeling because there are no small molecule-PfPKG crystal structures available.

67  
68 Our group recently reported the optimization of an isoxazole-based scaffold that lacks any obvious  
69 structural safety warnings and demonstrated *in vitro* potency comparable to 4-[2-(4-fluorophenyl)-  
70 5-(1-methylpiperidine-4-yl)-1H pyrrol-3-yl] pyridine (**2**) (Figure 1).<sup>14</sup> The trisubstituted pyrrole, **2**  
71 was among the first potent inhibitors of PfPKG, blocked development of *P. falciparum* *in vitro*  
72 and *P. berghei* *in vivo*, and was characterized as an ATP-competitive inhibitor of *E. tenella* PKG.<sup>4,</sup>  
73 <sup>5, 8, 9</sup> Its use *in vivo* is limited by rapid metabolism to a less active derivative. We believe it is vital  
74 to characterize the novel and potentially important series of isoxazole compounds because of the  
75 distinct nature of the chemotype, compared to either the imidazopyridine or pyrrole templates.  
76 Here we demonstrate the mode of interaction of PfPKG with isoxazole-containing compounds and  
77 the structure of two unpublished examples in this series that employ functionality not previously  
78 studied in this series. Our data provide insight into the inhibition of PfPKG by this novel  
79 chemotype and suggest directions for inhibitor optimization. They also increase the understanding  
80 of selectivity determinants in the PfPKG active site and assist the future design of inhibitors that  
81 are selective for PfPKG over the human homolog.

82  
83

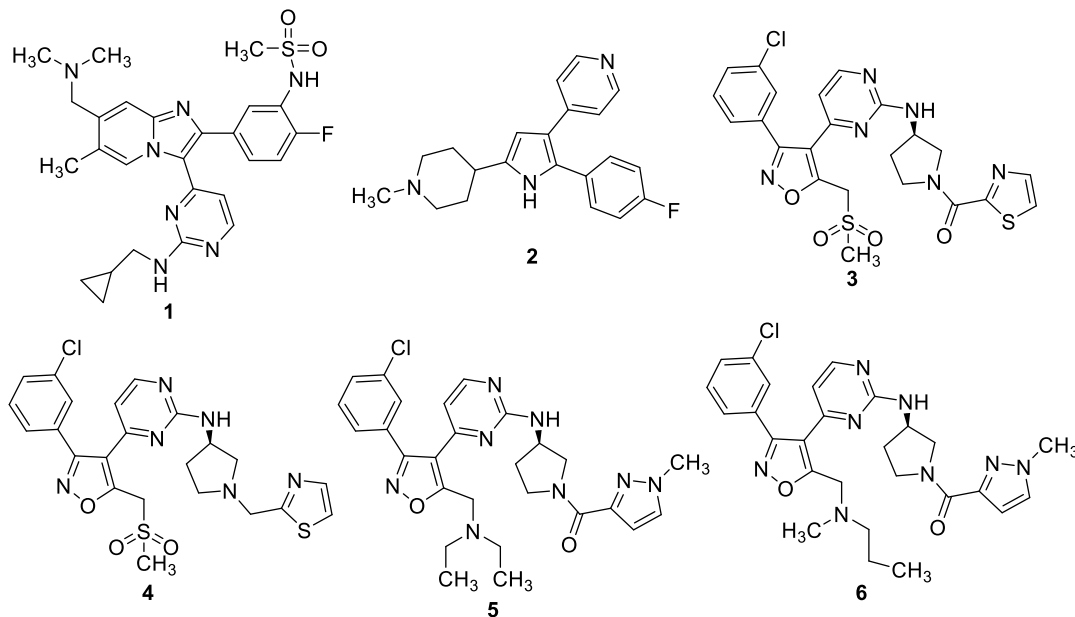

84  
85 **Figure 1.** Structures of PfPKG inhibitors. Activities of 2–6 were determined in this work.  
86

## 87 **Materials and methods**

### 88 *Site-directed mutagenesis to generate gatekeeper mutant (T618Q) PfPKG*

89 Site-directed mutagenesis was performed to introduce the T618Q gatekeeper mutation into the  
90 full-length PfPKG gene using the following primers: Forward: 5'-  
91 CTATTTTCTACAGGAATTAGTAACAGGTGGAG -3; Reverse: 5'-  
92 GTTACTAATTCCTGTAGAAAATAGAAATATTTAG -3'. The wild type (WT) PfPKG in the  
93 pTrcHis-C vector was a kind gift from the laboratories of David Baker. Reaction conditions  
94 included 1X HF buffer (Thermo Fisher Scientific # F530S), ~100 ng of template DNA, 0.5  $\mu$ M of  
95 each primer, 0.2 mM dNTPs, and 1 unit of Phusion polymerase (Thermo Fisher Scientific #  
96 F530S). A PCR protocol was implemented as follows: initial denaturation at 98  $^{\circ}$ C for 5 minutes;  
97 30 cycles of extension at 98  $^{\circ}$ C for 30 seconds, 55  $^{\circ}$ C for 60 seconds, and 72  $^{\circ}$ C for 3.5 minutes;  
98 and a final elongation at 72  $^{\circ}$ C for 10 minutes. Template DNA was digested with 10 units of DpnI  
99 (Fisher Scientific # FERER1701) at 37  $^{\circ}$ C for 2 hours and the PCR product was transformed into  
100 XL Blue cells. The mutation was confirmed by Sanger sequencing.

### 101 *Expression and purification of WT and T618Q PfPKG*

102 Full-length WT PfPKG (Uniprot ID Q8I719), a kind gift from David Baker,<sup>6</sup> and T618Q PfPKG  
103 were expressed in BL21 (DE3) Star cells. The genes were cloned into the pTrcHisC vector, which  
104 incorporates a 6X His-tag at the N-terminus. A 250 mL culture of LB containing 100  $\mu$ g/mL  
105 carbenicillin was inoculated and grown overnight at 37  $^{\circ}$ C with shaking at 225 RPM. Then 250  
106 mL of fresh media with 100  $\mu$ g/mL carbenicillin was added and the resulting culture was divided  
107 equally into two flasks. IPTG was added to 1 mM and the flasks were incubated with shaking at  
108 18  $^{\circ}$ C overnight. Cultures were pelleted by centrifugation at 10,000 x g for 15 minutes. The pellets  
109 were lysed with 10 mL of ice-cold B-PER extraction reagent (Thermo Fisher Scientific # 78243)  
110 containing 1X protease inhibitors (Thermo Fisher Scientific # A32953). Following a 10-minute  
111 incubation, the lysis solution was centrifuged at 15,000 x g for 15 minutes and the supernatant was  
112 collected.  
113

114 The soluble lysate was poured over HisPur Cobalt Resin (Thermo Fisher Scientific #  
115 89965) that had been pre-equilibrated with 25 mM HEPES, 20 mM NaCl, 10 mM imidazole pH  
116 7.5. The lysate and resin were incubated, with constant rotation, at 4 °C for 20 minutes. The resin  
117 was washed with equilibration buffer until no more protein eluted from the column. WT and  
118 T618Q PfPKG were eluted from the column using 25 mM HEPES, 20 mM NaCl, 120 mM KCl,  
119 and 250 mM imidazole at pH 7.5. Eluted fractions were tested for the presence of PfPKG by SDS-  
120 PAGE and fractions where a protein of 97.5 kDa was detected were collected. Pooled elution  
121 fractions were dialyzed in 25 mM HEPES, 20 mM NaCl, 120 mM KCl, and 5% glycerol at pH  
122 7.5. Purified protein was concentrated using a 15-mL Amicon 10 kDa MWCO concentrator (Sigma  
123 Aldrich # UFC901024). Enzyme purity and identity were evaluated by SDS-PAGE and Western  
124 Blot (Anti-His).

125

#### 126 *Expression and purification of hPKG*

127 hPKG (Uniprot ID Q13976) was synthesized by Invitrogen and cloned into the pEF-Bos vector (a  
128 kind gift from Dr. Ueli Gubler). The resulting vector was transiently transfected into HEK293 cells  
129 using the ExpiFectamine 293 Transfection Kit (Thermo Fisher Scientific # A14525). After  
130 enhancement, the culture was expressed for three days at 37 °C with rotation (~125 RPM) under a  
131 7% CO<sub>2</sub> atmosphere. The cells containing expressed hPKG were harvested by centrifugation at  
132 10,000 x g for 15 minutes. The resulting pellet was lysed with 10 mL/g of ice-cold M-PER reagent  
133 (Thermo Fisher Scientific # 78505) containing 1X protease inhibitor (Thermo Fisher Scientific #  
134 A32953). After a 10-minute incubation on ice, the cell lysate was centrifuged at 15,000 x g for 15  
135 minutes. Supernatant was poured over Pierce Glutathione agarose resin (Thermo Fisher Scientific  
136 # 16101) equilibrated with equilibration buffer 2 (50 mM Tris, 150 mM NaCl at pH 8) and  
137 incubated at 4 °C for 20 minutes. The flow-through was collected and the column was washed  
138 with equilibration buffer 2. hPKG was eluted with 50 mM Tris, 150 mM NaCl pH 8 containing 3  
139 mg/mL free glutathione. Enzyme purity and identity were evaluated by SDS-PAGE and Western  
140 Blot (Anti-GST).

141

#### 142 *Synthesis and characterization of inhibitors*

143 PfPKG inhibitor **2** was synthesized following established protocols.<sup>15</sup> PfPKG inhibitor **5** and **6**  
144 were synthesized as previously reported.<sup>14</sup> All reagents were used as provided by the supplier. All  
145 reactions were carried out under a nitrogen atmosphere. TLC was carried out on analytical silica  
146 gel G254 plates and visualized by UV light. Silica gel chromatography for purification was carried  
147 out on a Teledyne Isco Rf200+ using prepacked silica gel columns. NMRs were obtained on a  
148 Bruker Avance II instrument. Mass spectra were obtained on an Advion CMS spectrometer and  
149 on a Shimadzu LCMS2020 LCMS system. All final compounds were at least 95% pure by NMR  
150 and/or LC prior to evaluation. The spectra for these compounds are provided in Supporting  
151 Information.

152

153

154

155

156 Scheme 1:

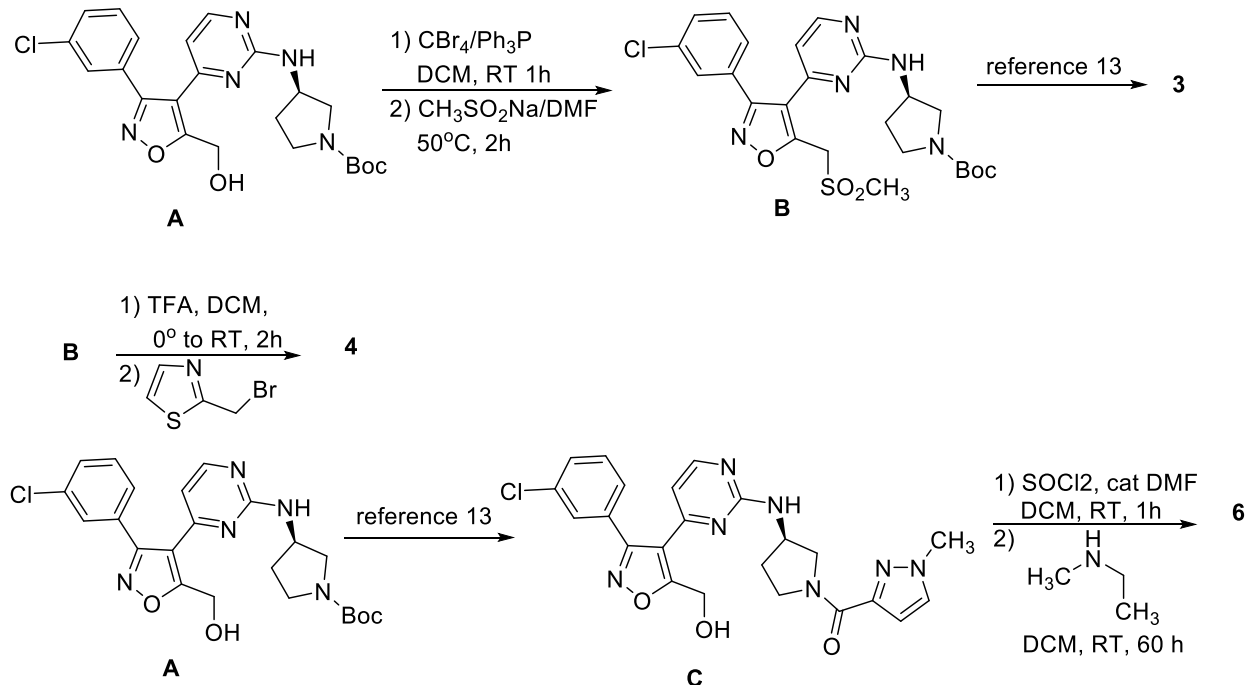

157

158 Intermediate A and 5 were synthesized as previously reported.<sup>14</sup>

159 **3**: 1.1 g (2.3 mmol) A was dissolved in 15 mL DCM at room temperature. 1.6 g (4.6 mmol)  
160  $\text{CBr}_4$  was added, followed by 1.2 g (4.6 mmol) triphenylphosphine. The reaction was stirred at  
161 room temperature under a nitrogen atmosphere for 1 hour when TLC indicated the reaction was  
162 complete. The reaction was diluted with 100 ml ethyl acetate and washed with 2 x 20 mL water,  
163 followed by 2 x 20 mL brine, dried and concentrated. The crude material was purified on a 40g  
164 Isco column eluting with 5% methanol in DCM to provide 0.75g (1.4 mmol, 61%) of  
165 intermediate **B** as a solid. Boc cleavage and acylation were carried out as previously described.<sup>12</sup>

166  $^1\text{H}$  NMR (d,  $\text{CDCl}_3$ , 400 MHz): 8.21 (d, 1H), 7.87 dd, 1H), 7.51 (m, 3H), 7.37 (m, 2H), 6.36 (br  
167 s, 1H), 5.76 (br s, 1H), 5.0 (m, 2H), 4.6 (m, 1H), 4.4 (m, 1H), 4.3 (t, 1H), 4.14 (dd, 1H), 3.9 (dd,  
168 1H), 3.83 (m, 1H), 3.09 (d, 3H), 2.33 (m, 1H), 2.1 (m, 1H).

169  $^{13}\text{C}$  (d,  $\text{CDCl}_3$ , 100 MHz): 165, 161, 160, 159.20, 159.5, 143, 134, 130, 129.5, 129.0, 127, 124,  
170 110, 52, 51, 49, 47, 45, 41, 32, 29.

171 **4**: Intermediate **B** was treated with trifluoroacetic acid in DCM as previously described.<sup>14</sup> 20 mg  
172 (0.046 mmol) of the amine was dissolved in 5 mL DCM and triethylamine (0.138 mmol, 3 equiv.)  
173 was added at room temperature. 2-bromomethylthiazole (10 mg, 0.0552 mmol, 1.2 equiv.) was  
174 added at room temperature and the reaction stirred for six hours when TLC showed consumption  
175 of **B**. The reaction was diluted with 15 mL DCM, washed twice with 20 mL water and brine, dried,

176 concentrated and purified using a 4g Isco column eluting with 5% MeOH in DCM to provide 18  
177 mg (0.034 mmol, 74%) of **4** as a solid.

178 <sup>1</sup>H NMR (d, CDCl<sub>3</sub>, 400 MHz): 8.20 (d, 1H), 7.70 (d, 1H), 7.54 (s, 1H), 7.47 (m, 1H), 7.37 (m,  
179 2H), 7.27 (d, 1H), 6.32 (br s, 1H), 5.61 (d, 1H), 5.01 (apparent q, 2H), 4.55 (m, 1H), 4.03 (d, 2H),  
180 3.08 (m, 4H), 2.80 (m, 2H), 2.54 (apparent q, 1H), 2.40 (m, 1H).

181 <sup>13</sup>C (d, CDCl<sub>3</sub>, 100 MHz): 170, 161, 160, 142, 134, 130.4, 130.1, 129.5, 129.0, 127, 119.6, 119.4,  
182 60, 56, 52.5, 52.1, 50.69, 50.62, 41.

183 Intermediate **C**: 2.00g (4.23 mmol) intermediate **B** was reacted with TFA in DCM, followed by  
184 amide coupling as previously described<sup>14</sup> using 1-methyl pyrazole-3-carboxylic acid to afford 1.6  
185 g (3.34 mmol, 79% yield) as a solid.

186 <sup>1</sup>H NMR (d, CDCl<sub>3</sub>, 400 MHz): 8.10 (m, 1H), 8.0 (m, 1H), 7.80 (m, 1H), 7.0 (m, 4H), 6.52 (br s,  
187 1H), 6.46 (apparent t, 1H), 3.92 (s, 2H), 3.86 (m, 3H), 3.74 (m, 1H), 3.65 (m, 2H), 2.3 (m, 1H),  
188 2.1 (m, 1H)

189 **6**: 100 mg (0.21 mmol) of intermediate **C** was dissolved in 10 mL DCM and cooled to 0°C in an  
190 ice bath. 1 drop of DMF was added, followed by 38 mg (0.32 mmol, 1.5 equiv) thionyl chloride.  
191 After 15 minutes, TLC analysis (8% MeOH/DCM) indicated the reaction was complete. The  
192 reaction was diluted with 10 mL DCM and washed with water until neutral. The solution was dried  
193 and concentrated. The crude chloride was used without further purification. 50 mg (0.10 mmol) of  
194 this material was dissolved in 5 mL DCM at room temperature. 37 mg (0.50 mmol) of N-methyl  
195 propyl amine was added and the reaction was stirred at room temperature for 60 hours when TLC  
196 (10% MeOH/DCM) indicated consumption of starting material. The reaction was diluted with 20  
197 mL DCM and washed twice with 10 mL brine. The crude product was purified using a 4 g Isco  
198 prepacked column eluting with 10% MeOH/DCM to afford 30 mg (0.056 mmol, 56%) of the  
199 desired product as a solid.

200 <sup>1</sup>H NMR (d, CD<sub>3</sub>OD, 400 MHz): 8.35 (apparent t, 1H), 8.08 (d, 1H), 7.84 (d, 1H), 7.44 (m, 4H),  
201 6.5 (br s, 1H), 4.4 (m 3H), 3.5-3.9 (m, 7H), 2.45-2.72 (m, 5H), 2.3 (m, 1H), 2.1 (m, 1H), 1.59 (m,  
202 2H), 0.9 (m, 3H)

### 203 *IMAP assay to determine PfPKG and hPKG specific activities*

204 WT and mutant PfPKG kinase activities were determined using the commercial immobilized metal  
205 ion affinity-based fluorescence polarization (IMAP) assay (Molecular Devices # R8127).<sup>16</sup> The  
206 kinase assay wells (20 μL total volume) contained assay buffer RB-T (10 mM Tris-HCl, pH 7.2,  
207 10 mM MgCl<sub>2</sub>, 0.05% NaN<sub>3</sub>, 0.01% Tween®20), recombinant PfPKG (ranging from ~0.2 – 0.002  
208 mg/mL in the well), 120 nM fluorescent peptide substrate (FAM-PKAtide), 10 μM ATP, 1 μM  
209 cGMP, and 1.0 mM DTT. The reactions were initiated by the addition of FAM-PKAtide and  
210 incubated for one hour. Then 60 μL of the Progressive Binding Reagent (PBR) mixture was added  
211 and the resulting solutions (80 μL total volume) were incubated for 30 minutes. The PBR mixture  
212 was made according to the commercial protocol for FAM-PKAtide substrate (100% 1X IMAP  
213 Progressive Binding Buffer A combined with PBR diluted 400-fold). Fluorescent polarization was  
214 read parallel and perpendicular to the excitation plane (ex. 485 nm/ em. 528 nm) using a Synergy

215 2 Microplate reader (BioTek, Winooski, VT) and the relationship between signal and time was  
216 linear (Figure S2). The averages of the signals from each experimental well were calculated (n=2).  
217 Various PfPKG concentrations were tested and the resulting signals (mPolarization) were graphed  
218 against total enzyme concentrations used in the well (mg/mL). The slopes of these graphs  
219 corresponded to the PfPKG specific activities and were used to find initial screening conditions  
220 and to ensure consistency of purification quality. The specific activity of hPKG was tested using  
221 a similar protocol with the following modifications: The substrate FAM-IP3R-derived peptide  
222 (RP7035) and the corresponding commercial protocol for the PBR mixture (75% 1X IMAP  
223 Progressive Binding Buffer A, 25% 1X IMAP Progressive Binding Buffer B, PBR diluted 600-  
224 fold) were used. After addition of the PBR mixture, the solutions were incubated for 1 hour instead  
225 of 30 minutes.

#### 226 227 *Inhibitor IC<sub>50</sub> determination*

228 IC<sub>50</sub> values were determined using the IMAP assay conditions described above. Inhibitor  
229 concentrations ranged from 4 nM to 10 μM in the wells. The following amounts of enzymes were  
230 used in each assay well: 9 nM of WT PfPKG, 4 nM of T618Q PfPKG, and 5 nM of hPKG (to  
231 achieve a maximal signal of ~250 mPolarization units). Additionally, enzyme was preincubated  
232 with inhibitor concentrations for 15 minutes at room temperature prior to adding the enzyme-  
233 inhibitor solution into the assay wells. The trisubstituted pyrrole (**2**) was used as a positive control  
234 in each experiment. The data were analyzed using a four-parameter logistic curve using Microsoft  
235 Excel Solver and dose response curves were generated using Microsoft Excel.

#### 236 237 *Kinetic IMAP assay for determination of Michaelis constant (K<sub>m</sub>) of ATP and FAM-PKAtide*

238 The IMAP assay was adapted to a kinetic format to determine initial velocities and Michaelis  
239 constants for ATP for the PfPKG enzymes. Instead of incubating the reaction for 1 hour as  
240 described above, the reaction was allowed to proceed for different time periods ranging from 0 to  
241 70 minutes. The kinetic IMAP assay was implemented by initiating the 20-minute incubation  
242 period of the fluorescent peptide, cGMP, inhibitor and PfPKG at different times, starting with the  
243 wells that required the longest incubation. After a well had been incubated for 20 minutes, ATP  
244 was added to the well to initiate the reaction (this was done at different times depending on the  
245 desired reaction time, starting with the wells that required the longest incubation times). The  
246 reaction mixtures were then incubated for desired amounts of time and the PBR developing  
247 solution was added to all reactions at once, stopping all reactions at the same time. After the final  
248 incubation, fluorescence polarization was read and velocities were determined from the change in  
249 polarization over time using data points where the relationship between polarization and time was  
250 linear (at least 60 minutes) (Figure S2). Velocities were determined at different concentrations of  
251 ATP (0.78 – 100 μM) while keeping the FAM-PKAtide and cGMP at original concentrations  
252 described above. Enzyme amounts used for these experiments were 28 nM of WT PfPKG and 12  
253 nM of T618Q PfPKG in the well. Initial velocities were converted to percent activities and plotted  
254 against substrate concentrations in KaleidaGraph. The resulting curves were fit to the Michaelis-  
255 Menten equation. Reported K<sub>m</sub> values were the result of three replicate measurements for WT  
256 PfPKG and four measurements for T618Q PfPKG. Statistical significances were evaluated using  
257 a two-sided Student's t-test.

258  
259  
260

### 261 *Inhibitor $K_i$ and mechanism of inhibition determination by Dixon plots*

262 The mechanism of inhibition was kinetically determined by measuring reaction rates in the  
263 presence of varying concentrations of inhibitor and substrate. The procedure was conducted as  
264 described above for determining PfPKG  $K_m$  values, with a few alterations. Namely, inhibitors were  
265 pre-incubated with PfPKG, cGMP, and FAM-PKAtide for 20 minutes before the reaction was  
266 initiated with ATP (Final ATP Concentrations in the well: 12.5, 25, 37.5, and 50  $\mu$ M). Four novel  
267 isoxazole inhibitors (**3-6**) and the trisubstituted pyrrole **2** were tested by this method. The  
268 concentrations of inhibitors in assay wells were as follows: **2** (2.5 and 5 nM), **3** (2.5 and 5 nM), **4**  
269 (250 and 500 nM), **5** (2.5 and 5 nM), and **6** (100 and 200 nM). Velocities for each combination of  
270 inhibitor and ATP concentrations were determined as described above and the reciprocal velocities  
271 were plotted against inhibitor concentration in Excel. The data were fitted to linear equations for  
272 each substrate concentration. The average of the inhibitor concentrations at the intersection points  
273 of all lines was determined and corresponded to the  $-K_i$  value for that experiment. The reported  $K_i$   
274 values were the result of three replicate measurements.  
275

### 276 *Molecular docking simulations*

277 The PfPKG structure (PDB ID 5DYK)<sup>17</sup> and hPKG structure (PDB ID 6BDL) were prepared by  
278 removing water molecules and adding hydrogen atoms in GOLD 5.8.1 (Cambridge  
279 Crystallographic Data Centre, Cambridge, UK).<sup>18</sup> The PfPKG mutant T618Q structure was  
280 generated by homology modeling in the Molecular Operating Environment (MOE) (Chemical  
281 Computing Group, Montreal, CA)<sup>19</sup> using the PfPKG structure (PDB ID 5DYK) as a model. MOE  
282 was used for the necessary simulations to prepare the mutant protein structure before docking. The  
283 optimal model is provided based on Boltzmann-weighted randomized samples of backbone and  
284 side chain conformations, scored based on contact energy function.<sup>20</sup> The three dimensional ligand  
285 coordinate .sdf files for **3-6** were generated in ChemDraw. Molecules **3-6** were docked with the  
286 program GOLD 5.8.1 against PfPKG, PfPKG mutant T618Q, and hPKG. Default parameters of  
287 GOLD, that include a 10 Å radius, were used for docking and the generated poses were evaluated  
288 using the GoldScore function with the exception that the search efficiency for the genetic algorithm  
289 was increased to 200%. The binding pocket was defined as a sphere, with a radius of 10 Å, centered  
290 on the coordinates of the Thr618 oxygen atom in the WT PfPKG. In the T618Q mutant PfPKG the  
291 binding pocket was centered around the Gln618 oxygen atom and around the Met438 sulfur atom  
292 in the hPKG. These results were compared to those using a sphere with a 20 Å radius centered on  
293 the same coordinates.  
294

### 295 **Results and Discussion**

296 The  $IC_{50}$  of **2** and four isoxazole compounds (**3-6**) against recombinant, wild type (WT) PfPKG  
297 were determined using FAM-PKAtide as substrate in an IMAP assay<sup>16</sup> (Table 1, Figure S1-S3).  
298 The  $IC_{50}$  of reference compound **2** was determined to be  $31 \pm 6$  nM (Table 1). This is higher but  
299 qualitatively similar to the previously reported  $IC_{50}$  (8.53 nM) against partially purified PfPKG  
300 obtained using a <sup>33</sup>P-phosphorylated peptide substrate.<sup>3</sup> The  $IC_{50}$  of **3** and **5** were found to be  $14 \pm$   
301  $1$  and  $21 \pm 11$  nM, respectively, and similar to that of **2**. On the other hand, **4** and **6** were nearly  
302 57-fold and 20-fold less potent, respectively than their matched pair analogs, **3** and **5**. The  
303 interactions lost or altered from removing the carbonyl in **3** or altering the diethylamino moiety in  
304 **5** significantly reduced binding affinity ( $p < 0.05$ ) (Figure 1).  
305



306 **Table 1.** Experimental determination of  $IC_{50}$  and  $K_i$  of **2-6** for WT PfPKG. Estimated  $K_i$  was  
307 calculated using the tight-binding Cheng-Prusoff Equation.<sup>21-23</sup> Experimental  $K_i$  was determined  
308 by Dixon Plot. Values are the mean of at least two biological replicates  $\pm$  standard error.

309

| Compound | $IC_{50}^{WT}$ (PfPKG)<br>(nM) | Estimated $K_i$<br>(nM) | Experimental $K_i$<br>(nM) |
|----------|--------------------------------|-------------------------|----------------------------|
| <b>2</b> | 31 $\pm$ 6                     | 1.7 $\pm$ 0.4           | 1.4 $\pm$ 0.5              |
| <b>3</b> | 14 $\pm$ 1                     | 0.70 $\pm$ 0.04         | 0.7 $\pm$ 0.2              |
| <b>4</b> | 792 $\pm$ 115                  | 50.8 $\pm$ 7.4          | 210 $\pm$ 41               |
| <b>5</b> | 21 $\pm$ 11                    | 1.1 $\pm$ 0.7           | 2.3 $\pm$ 0.9              |
| <b>6</b> | 425 $\pm$ 133                  | 27.1 $\pm$ 8.5          | 87 $\pm$ 24                |

310

312 While **2** was demonstrated to compete with ATP in *E. tenella* PKG,<sup>5</sup> the mechanisms of PfPKG  
313 inhibition by **2** or the structurally distinct isoxazoles have not been empirically determined. In  
314 order to investigate their binding affinities and mechanism of action, we adapted the IMAP assay  
315 to a kinetic format (see Methods for details). The IMAP assay eliminates the need for radioactive  
316 substrates and ATP and can be implemented quickly in a 96-well assay format. Rather than reading  
317 a single, quantitative reaction endpoint with the traditional IMAP protocol, we measured  
318 fluorescence polarization at different time points and used the change in polarization over time to  
319 determine reaction velocities. This made it possible to determine reaction kinetics and to calculate  
320  $K_m$  and  $K_i$ . To our knowledge, this is the first reported modification of the simple mix and read  
321 IMAP assay, developed by Molecular Devices, for use in kinetic measurements.

322

323 Using the kinetic IMAP assay, we generated Dixon plots and determined inhibition constants ( $K_i$ )  
324 for **2-6**.<sup>21</sup> Figure 2 shows the inverse rates of WT PfPKG at various concentrations of ATP (12.5,  
325 25, 37.5 and 50  $\mu$ M), and **2** or **3** (0, 2.5 and 5 nM). The intersection points of the lines were found  
326 in the second quadrant and indicated that both compounds are ATP-competitive inhibitors of  
327 PfPKG. We found this to be characteristic for all compounds tested (Figure S4).  $K_i$  obtained  
328 experimentally for each compound are listed in Table 1.

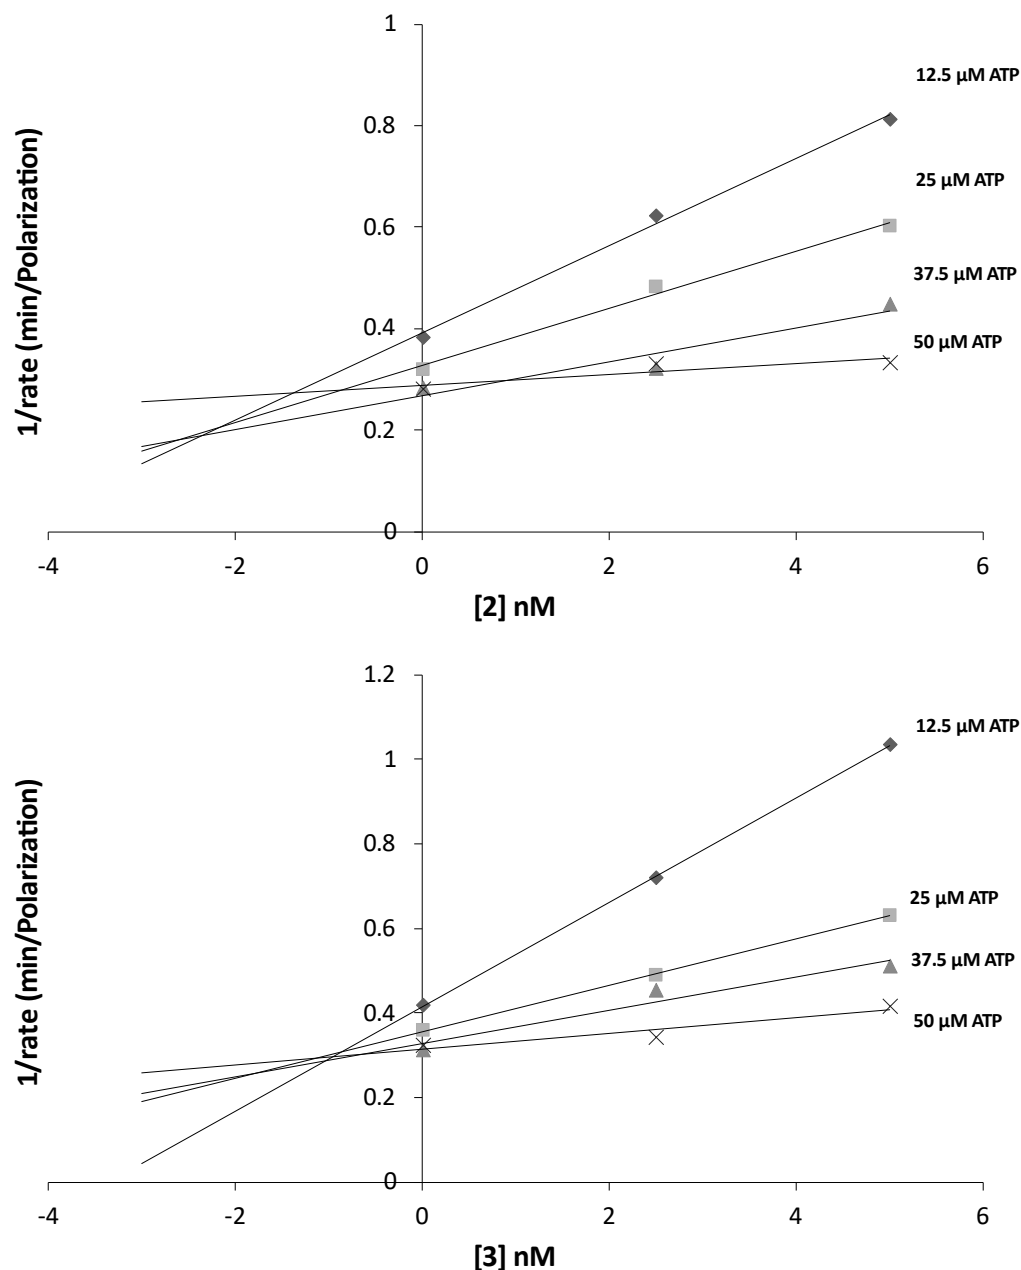

329  
330 **Figure 2.** Experimental determination of  $K_i$ . A Dixon Plot showed inverse initial velocities in the  
331 presence of **2** and **3** at different ATP concentrations. The intersection points for both graphs in the  
332 top left quadrant corresponded to a mechanism of competitive inhibition. Data shown are  
333 representative of three biological replicates used to determine means reported in Table 1.  
334

335 We determined the Michaelis constant ( $K_m$ ) of WT PfPKG for ATP is  $6.9 \pm 0.1 \mu\text{M}$  and for T618Q  
336 is  $10.0 \pm 1.6 \mu\text{M}$  (Figure 3). It is similar to the  $K_m$  of *E. tenella* PKG for ATP ( $12 \pm 2 \mu\text{M}$ )  
337 determined using  $[\gamma\text{-}^{33}\text{P}]\text{ATP}$  and the peptide substrate (biotinyl-*e*-aminocaproyl-GRTGRRNSI-  
338 OH).<sup>5</sup> The  $K_m$  of PfPKG was used to convert  $\text{IC}_{50}$  of **3-6** (Table 1) to estimated  $K_i$ , using the  
339 Cheng-Prusoff equation.<sup>21</sup> We found our experimentally determined  $K_i$ 's to be in agreement with  
340 the estimated values that were predicted by the Cheng-Prusoff equation.<sup>22, 23</sup> Our experimental  $K_i$

341 data showed that **3** ( $K_i$ :  $0.7 \pm 0.2$  nM) and **5** ( $K_i$ :  $2.3 \pm 0.9$  nM) had similar affinities for PfPKG as  
342 **2** ( $K_i$ :  $1.4 \pm 0.5$  nM). As expected, the two less potent compounds based on  $IC_{50}$  values, **4** ( $K_i$ :  $210$   
343  $\pm 41$  nM) and **6** ( $K_i$ :  $87 \pm 24$  nM), had  $\sim 2$  orders of magnitude higher  $K_i$  values compared to **2**, **3**  
344 and **5**.

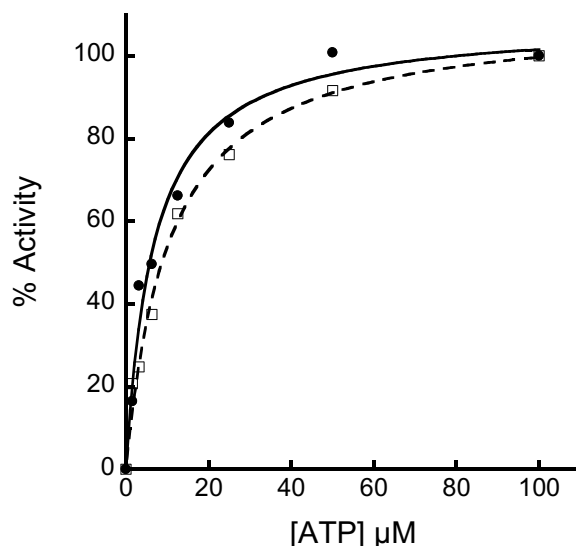

345 **Figure 3.** Experimental determination of  $K_m$ . Percent activities of WT (●) and mutant T618Q  
346 PfPKG (□) with various ATP concentrations. Data were fit to the Michaelis-Menten equation using  
347 KaleidaGraph. Data shown are representative of three biological replicates used to determine the  
348 mean.  
349

350  
351 In order to develop hypotheses to explain the relative binding affinities of structurally-similar pairs  
352 of compounds, **3** versus **4**, and **5** versus **6**, we conducted molecular docking studies. We tested  
353 binding pockets defined by radii of 10 Å, 20 Å and 30 Å. The same protein-molecule interactions  
354 were observed in all cases (data not shown). Therefore, further docking studies were conducted  
355 using a binding pocket of 10 Å, the default parameter in GOLD. Evaluation criteria for selection  
356 of the preferred pose for each molecule were based on previously observed and predicted ligand  
357 interactions with PfPKG and PvPKG and experimentally determined  $K_i$  values in our study.  
358 Docking energy scores were not sufficiently different from each other to be used for pose selection.  
359

360 Previous crystallographic and docking studies have examined binding of three different ATP-  
361 competitive inhibitors with *P. vivax* PKG (PvPKG) or PfPKG (for example, PvPKG bound to  
362 ML-10 (PDB: 5EZR)).<sup>12</sup> This structure shows ligand interactions with Val614 (Val621 in PfPKG),  
363 Thr611 (Thr618 in PfPKG), Asp675 (Asp682 in PfPKG) and Phe676 (Phe683 in PfPKG).<sup>12</sup>  
364 Modeling interactions between PfPKG and a trisubstituted thiazole using the apo PfPKG crystal  
365 structure (PDB: 5DYK) identified ligand interactions with Thr618, Asp682, Val621 of PfPKG, as  
366 well.<sup>24</sup> Additional interactions were predicted with Lys570 and Tyr822. Similarly, modeling  
367 interactions between PfPKG and a trisubstituted imidazole identified Asp682 and Val621 as  
368 critical interactions.<sup>25</sup> In addition, this modeling study suggested an interaction with Glu625.  
369 Together, three studies<sup>12, 24, 25</sup> identified Asp682 and Val621 as forming critical interactions with

370 ATP-competitive inhibitors of PfPKG. We used these residues as one factor to guide pose selection  
371 in our modeling studies based on the assumption that residues described previously, to interact  
372 with ligands that occupy the ATP-binding site, are more likely to be involved in interactions with  
373 **3**, **4**, **5**, and **6**. Below we describe the use of the docking results to develop hypotheses about  
374 molecular interactions that may be responsible for the different binding affinities of **3**, **4**, **5**, and **6**.  
375

376 Since **3** has a lower experimentally determined  $K_i$  than **4**, it is predicted to have stronger and/or  
377 more interactions than **4**. The pose selected for the PfPKG-**3** complex (Figures 4C and 4E) located  
378 **3** in a similar position as the ATP analog phosphoamino phosphonic acid-adenylate ester  
379 (AMPPNP) in an experimentally determined complex with PvPKG (5DZC).<sup>17</sup> This predicted  
380 model is consistent with kinetic data which indicated that **3** is an ATP competitive inhibitor of  
381 PfPKG. Compound **3** has a  $K_i$  value approximately 300-fold smaller compared to **4**. The only  
382 structural difference between **3** and **4** is a carbonyl group (indicated by an arrow in Figures 4A and  
383 B). The selected PfPKG-**3** pose showed five interactions between PfPKG and **3**. Three of these  
384 interactions were also present in the selected pose of **4**, including an arene-arene interaction with  
385 Phe616, a hydrogen bond with the backbone of Val621, and a hydrogen bond with the sidechain  
386 of Thr593 (Figures 4D and 4F). The higher binding affinity of **3** is likely driven by hydrogen  
387 bonding between its carbonyl group and the backbone amide of Asp682 in PfPKG. In addition,  
388 the pyrimidine group of **3** showed a hydrogen bond with Lys570 in the selected pose. We  
389 hypothesize that the lower binding affinity of **4** may be attributed, in part, to the absence of the  
390 corresponding carbonyl group and the subsequent lack of this key hydrogen bond with Asp682.  
391 Compound **4**'s interaction with Val555 in the selected pose was a van der Waal's interaction  
392 (arene-H), which is expected to be weaker than Lys570's side chain hydrogen bond with **3**, and  
393 this difference could contribute to **4**'s lower binding affinity.

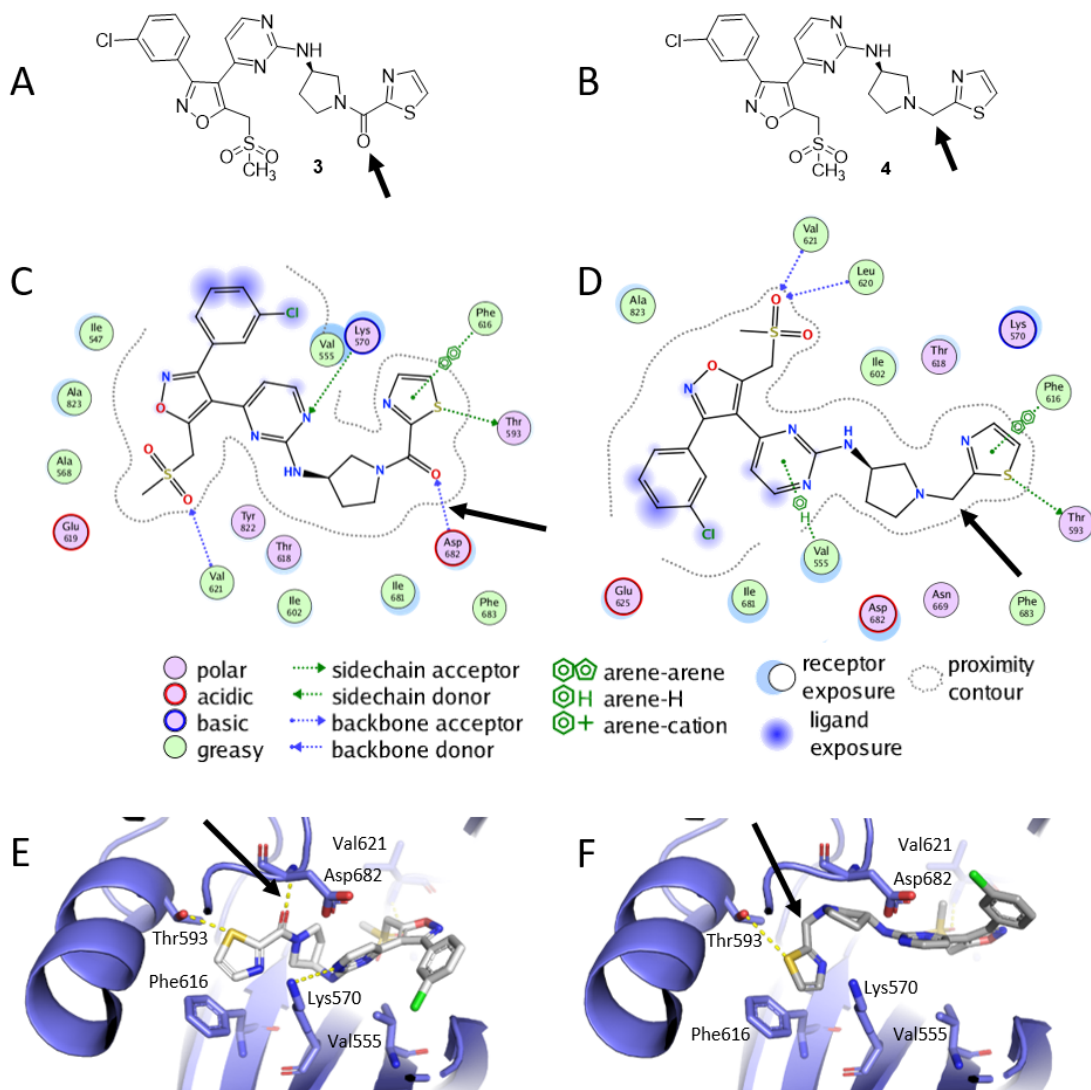

394  
 395 **Figure 4.** PfPKG interactions with **3** and **4**. Two-dimensional structures of **3** (A) and **4** (B)  
 396 are shown with their structural difference indicated by a black arrow. PfPKG interactions with **3** (C)  
 397 and **4** (D) are shown as 2D cartoons with differences indicated by black arrows. Binding of **3** (E)  
 398 and **4** (F) to PfPKG is depicted in 3D. PfPKG amino acid residues (carbons in blue) and **3** and **4**  
 399 (carbons in white) are illustrated as sticks. Intermolecular interactions are displayed as dashed  
 400 yellow lines. Figures C and D were prepared using MOE.<sup>19</sup> Figures E and F were prepared using  
 401 PyMOL.<sup>26</sup>  
 402

403 The  $K_i$  value of **5** was ~38-fold lower for PfPKG than **6** indicating that **5** has a higher binding  
 404 affinity. The structural difference between **5** and **6** is in the amino substituent (indicated by an  
 405 arrow in Figure 5A and B). Both compounds are tertiary amines; **5** is symmetrically substituted  
 406 while **6** contains methyl and n-propyl groups, and their  $K_i$  data indicate a steric limitation in this  
 407 region. The selected docking poses showed the two compounds adopting different conformations  
 408 inside the binding site. In **5**, the diethylamino group and in **6**, the chlorobenzyl group was exposed  
 409 to solvent. The isoxazole rings of both compounds formed arene-cation interactions with the  
 410 Lys570 side chain. Docking predictions suggested van der Waal's (arene-H) interactions between

411 the pyrazole group of **5** and Tyr822 and the pyrazole group of **6** and Ala823. In the selected pose  
412 for the PfPKG-**5** complex, the backbone carbonyl of Glu619 formed a hydrogen bond with an  
413 amine in **5**. This hydrogen bond was absent in the selected pose for PfPKG-**6** complex (black arrow  
414 in Figures 5C and 5D). We hypothesize that hydrogen bonding with Glu619 is the likely driver of  
415 **5**'s lower  $K_i$  compared to **6**. Alternative poses for **5** are possible but were less favored because  
416 they did not provide sufficient explanation for **5**'s higher binding affinity for PfPKG compared to  
417 **6**.  
418

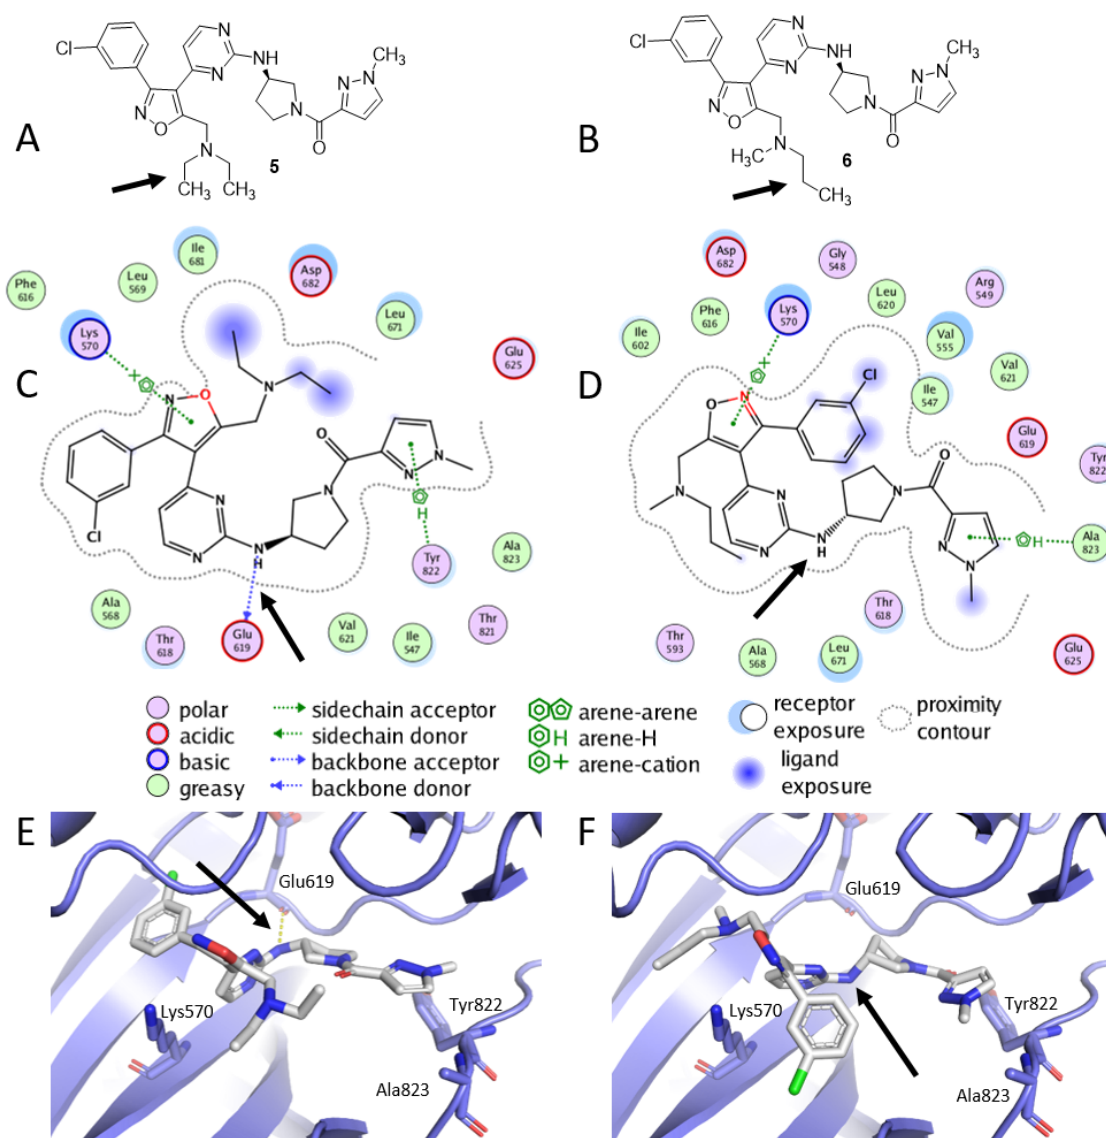

419  
420  
421 **Figure 5.** PfPKG interactions with **5** and **6**. Two-dimensional structures of **5** (A) and **6** (B), with  
422 their structural differences indicated by black arrows. PfPKG interactions with **5** (C) and **6** (D) are  
423 shown as 2D cartoons, with differences indicated by black arrows. Binding mode of **5** (E) and **6**  
424 (F) in PfPKG are depicted in 3D. PfPKG amino acid residues (carbons in blue) and **5** and **6**  
425 (carbons in white) are illustrated as sticks. Intermolecular interactions are displayed as dashed

426 yellow lines. Figures C and D were prepared using MOE.<sup>19</sup> Figures E and F were prepared using  
427 PyMOL.<sup>26</sup>

428  
429 To assess selectivity of compounds for PfPKG over the human enzyme, each molecule was  
430 screened for inhibition against hPKG at 10  $\mu$ M. All compounds were weak inhibitors of hPKG at  
431 10  $\mu$ M, suggesting excellent selectivity of **2-6** for WT PfPKG over the human enzyme (Table 2).  
432 Compounds were also evaluated against the T618Q PfPKG ‘gatekeeper’ mutant, in which access  
433 to the hydrophobic pocket appears blocked by the larger side chain of the glutamine substituent  
434 (Figures S5 and S6). At 10  $\mu$ M, **2-6** were inactive or weak inhibitors of T618Q PfPKG. The T618Q  
435 PfPKG mutant was found to have a small but significant difference in  $K_m$  for ATP ( $10.0 \pm 1.6 \mu$ M)  
436 compared to the WT PfPKG ( $6.9 \pm 0.1 \mu$ M) ( $p = 0.027$ ) (Figure 3). Previous work similarly found  
437 that the  $K_m$  of the *E. tenella* PKG gatekeeper mutant was higher than that of the WT enzyme.<sup>13, 27</sup>  
438

439 **Table 2.** Inhibition of hPKG and T618Q PfPKG. Values are the result of at least two replicate  
440 measurements and standard errors are shown.

| Compound | % Inhibition at 10 $\mu$ M<br>(hPKG) | % Inhibition at 10 $\mu$ M<br>(T618Q PfPKG) |
|----------|--------------------------------------|---------------------------------------------|
| <b>2</b> | $9.0 \pm 7.5$                        | $16.0 \pm 4.5$                              |
| <b>3</b> | $7.4 \pm 0.6$                        | $33 \pm 9$                                  |
| <b>4</b> | $13 \pm 4$                           | $0 \pm 0.5$                                 |
| <b>5</b> | $19 \pm 9$                           | $36 \pm 5$                                  |
| <b>6</b> | $12.2 \pm 0.8$                       | $6.5 \pm 8.0$                               |

441  
442 We used the Protein Pocket Volume application in MOE<sup>19</sup> to calculate the difference in volumes  
443 of the binding site in WT and T618Q enzymes. The estimated pocket size of WT was found to be  
444  $17.1 \text{ \AA}^3$  (13.8%) larger than that of T618Q (Figure S7). In order to obtain insights into **3**'s relative  
445 lack of inhibition of T618Q PfPKG, **3** was docked into the binding pocket of T618Q PfPKG  
446 (Figure 6). Since **3** was in close proximity to the Thr618 side chain in the WT enzyme, we  
447 hypothesize that the larger Gln sidechain in the T618Q mutant pushes **3** into a different binding  
448 mode. In addition, fewer interactions were observed when **3** was docked into T618Q PfPKG  
449 compared to WT (Figure 6 and Figure S7). For example, the arene-arene interaction between  
450 Phe616 and the thiazole ring of **3** (in the selected pose) was observed in PfPKG-**3** complex but  
451 was missing in the T618Q PfPKG-**3** complex (Fig. 6B-D). Similar results, demonstrating fewer  
452 interactions with T618Q PfPKG compared to PfPKG, were obtained for **4** (Figure S8). Finally, in  
453 order to generate hypotheses aimed at understanding the selectivity of **3** for PfPKG over hPKG, **3**  
454 was docked into hPKG $\alpha$ . The selected pose showed **3** retaining only hydrophobic interactions with  
455 hPKG $\alpha$  (Fig. 6E-F) and losing atomic interactions that were observed with PfPKG (Fig. 6). These  
456 lost interactions may explain why **3** lacks activity against hPKG.

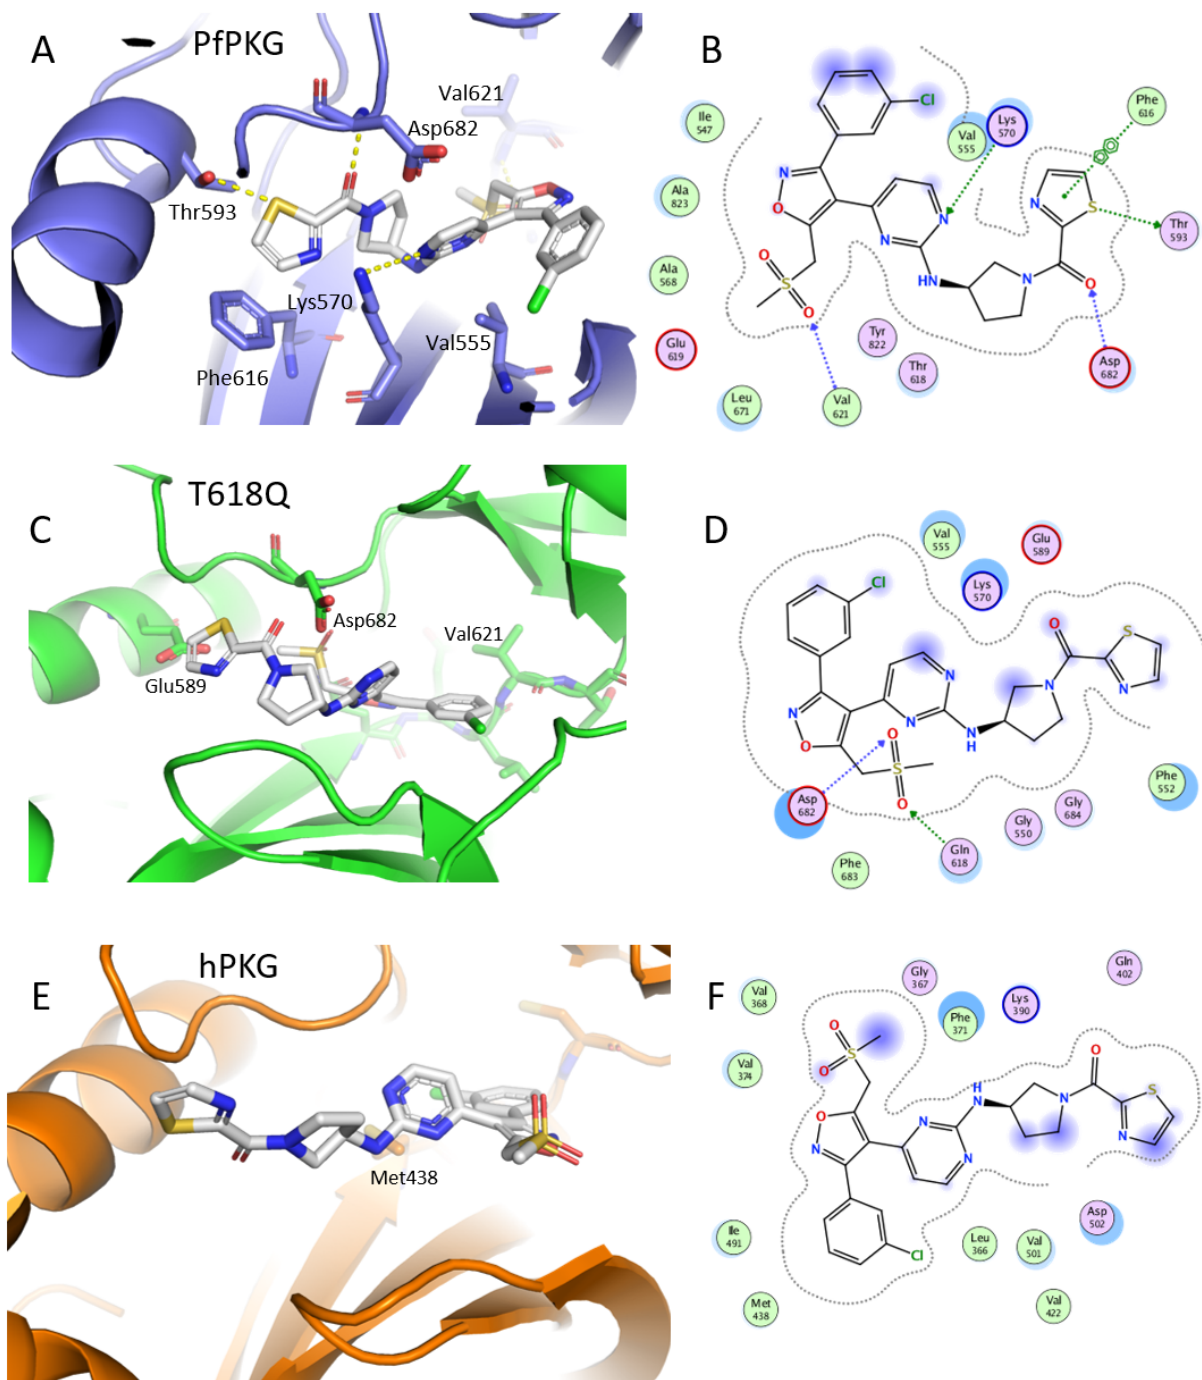

457  
458 **Figure 6.** Interactions between **3** and PfPKG, T618Q and hPKG. Interactions in selected poses of  
459 **3** docked into WT (A, B), T618Q (C, D) and hPKG (E and F). Figures A, C and E were prepared  
460 with PyMOL.<sup>26</sup> Figures B, D and F were prepared with MOE.<sup>19</sup>

461  
462 **Conclusion**

463 In this study, isoxazoles **3–6** were tested as potential inhibitors of PfPKG, T618Q PfPKG, and  
464 hPKG. A larger survey of the structure-activity relationships that led to the new compounds  
465 reported in this paper was reported previously.<sup>14</sup> While **5** was known to inhibit PfPKG,<sup>14</sup> its



466 mechanism of inhibition was unknown. Compounds **3** and **4** are reported here for the first time.  
467 Inhibitory activities of **3–6** against PfPKG and the potential mechanisms of inhibition were  
468 investigated, and Dixon plot analyses were used to determine  $K_i$  values. Lastly, to generate  
469 hypotheses to explain their relative  $K_i$  values, **3–6** were docked into the binding pockets of WT  
470 PfPKG, the ‘gatekeeper’ PfPKG mutant T618Q, and hPKG. The kinetic data demonstrated for the  
471 first time that **2** and structurally novel isoxazoles **3–6** are ATP competitive inhibitors of PfPKG.  
472 Compounds **3** and **5** have  $IC_{50}$  and  $K_i$  values comparable to **2**. Both **3** and **5** were also highly  
473 selective for PfPKG, with low activity against hPKG and T618Q PfPKG. This biochemical  
474 information is essential because, when coupled with computational results, it facilitates focused  
475 optimization to furnish potent, selective, orally bioavailable and drug-like PfPKG inhibitors that  
476 have advantages compared to known chemotypes. Assessment of the drug-like properties and cell-  
477 based activity of this series will be the subject of future publications.

478  
479 Computational docking studies with PfPKG combined with biochemical results obtained with **3–6**  
480 made it possible to form reasonable structure-based hypotheses for affinity changes detected by  
481 kinetic data. For example, we hypothesize that the loss of key hydrogen bond interactions and  
482 steric effects lead to conformational changes in interactions of inhibitors with the enzyme binding  
483 site. Previous structural studies suggested hydrogen bonds between Val621 and Asp682 of PfPKG  
484 and imidazole derivatives<sup>12, 25</sup> and thiazoles<sup>24</sup>. Our selected docking pose for **3** also captured the  
485 importance of engaging Val621 and Asp682 of PfPKG to achieve potency of inhibitors targeting  
486 PfPKG’s ATP-binding pocket. We caution that these poses are possibilities predicted via docking  
487 studies and not experimentally determined.

488  
489 We are continuing to develop these models by studying additional compounds in this class and  
490 investigate structural changes to the amino pyrrolidine and heterocyclic carboxamide. The initial  
491 results reported here furnished design hypotheses for more potent PfPKG inhibitors. As one  
492 example, additional sulfone analogs of **3** are being evaluated, along with electronic effects in the  
493 isoxazole ring that may influence arene-cation interactions with PfPKG. A second example is the  
494 apparent limited steric environment surrounding the tertiary amine in **3**. The conformational  
495 rearrangement suggested by this change resulted in a less potent inhibitor and revealed altered  
496 interactions within the amine binding site that can be probed with new derivatives. Work is  
497 underway to evaluate these hypotheses using crystal structures of one or more of these compounds  
498 bound to PfPKG. As new analogs are prepared and evaluated, the docking model can be improved,  
499 and its predictive capabilities enhanced.

500  
501 We envision that if PfPKG inhibitors reach the clinic, they will be used in combination with other  
502 anti-malarials to achieve malaria chemoprotection. Combination therapy is essential for reducing  
503 the likelihood of parasite resistance. Previous experiments on evolved resistance demonstrated that  
504 resistance to ATP-competitive inhibitors of PfPKG is not easily acquired.<sup>12, 25</sup> Parasites developed  
505 only low-level resistance through mutations in proteins other than PfPKG and inhibitor-resistant  
506 parasites did not carry the T618Q substitution.<sup>25</sup> These data suggest that high-level resistance to  
507 PfPKG inhibitors via mutations in the target protein is unlikely to be facile and underscore  
508 PfPKG’s attractiveness as an anti-malarial drug target.

509  
510 While our work focuses of ATP-competitive inhibitors of PfPKG, additional chemotypes might  
511 be discovered through investigations of allosteric mechanisms of PfPKG activation. The

512 regulatory domain of PfPKG contains three functional cGMP binding sites (an additional one is  
513 degenerate and incapable of binding cGMP) compared to two cGMP-binding sites in hPKG. The  
514 unique mechanism of PfPKG allosteric activation<sup>17, 28-30</sup> may offer novel means of inhibition - a  
515 cGMP analog reduces *in vitro* activity of recombinant PfPKG carrying a single cGMP site.<sup>30</sup>  
516 Effect of cGMP analogs on the activity of full-length PfPKG has not yet been examined. Given  
517 the urgent need for new chemotypes for an important new target against a disease that causes  
518 substantial morbidity and mortality, our approach, of coupling experimental and *in silico* results,  
519 and the data presented herein represent a useful advance in PfPKG biochemistry.  
520

#### 521 **Accession codes**

522 PfPKG: UniProt ID Q8I719

523 hPKG gene: UniProt ID Q13976  
524

#### 525 **Acknowledgements**

526 The authors acknowledge support from the National Institutes of Health award R01AI133633-01  
527 to PB, DPR and JJS, the United States Department of Defense award W81XWH2010386 to PB,  
528 and the Margaret and Herman Sokol Endowment to JJS and DPR.  
529

#### 530 **Supporting information**

531 Supplemental information: Supplemental Figures S1-S8 with legends.

532 Spectra for **3**, **4**, (proton and carbon NMRs) and **6** (proton NMR).  
533

#### 534 **References** 535

- 536 [1] WHO. (2020) World Health Organization World Malaria Report.
- 537 [2] Burrows, J. N., Duparc, S., Gutteridge, W. E., van Huijsduijnen, R. H., Kaszubska, W.,  
538 Macintyre, F., Mazzuri, S., Möhrle, J. J., and Wells, T. N. (2017) New developments in  
539 anti-malarial target candidate and product profiles, *Malar. J.* *16*, 26.
- 540 [3] Diaz, C. A., Allocco, J., Powles, M. A., Yeung, L., Donald, R. G., Anderson, J. W., and  
541 Liberator, P. A. (2006) Characterization of Plasmodium falciparum cGMP-dependent  
542 protein kinase (PfPKG): antiparasitic activity of a PKG inhibitor, *Mol. Biochem. Parasitol.*  
543 *146*, 78-88.
- 544 [4] Donald, R. G., Allocco, J., Singh, S. B., Nare, B., Salowe, S. P., Wiltsie, J., and Liberator, P.  
545 A. (2002) Toxoplasma gondii cyclic GMP-dependent kinase: chemotherapeutic targeting  
546 of an essential parasite protein kinase, *Eukaryot. Cell* *1*, 317-328.
- 547 [5] Gurnett, A. M., Liberator, P. A., Dulski, P. M., Salowe, S. P., Donald, R. G., Anderson, J. W.,  
548 Wiltsie, J., Diaz, C. A., Harris, G., and Chang, B. (2002) Purification and molecular  
549 characterization of cGMP-dependent protein kinase from apicomplexan parasites a novel  
550 chemotherapeutic target, *J. Biol. Chem.* *277*, 15913-15922.
- 551 [6] Deng, W., and Baker, D. A. (2002) A novel cyclic GMP-dependent protein kinase is expressed  
552 in the ring stage of the Plasmodium falciparum life cycle, *Mol. Microbiol.* *44*, 1141-1151.
- 553 [7] McRobert, L., Taylor, C. J., Deng, W., Fivelman, Q. L., Cummings, R. M., Polley, S. D.,  
554 Billker, O., and Baker, D. A. (2008) Gametogenesis in malaria parasites is mediated by the  
555 cGMP-dependent protein kinase, *PLoS Biol* *6*, e139.
- 556 [8] Panchal, D., and Bhanot, P. (2010) Activity of a trisubstituted pyrrole in inhibiting sporozoite  
557 invasion and blocking malaria infection, *Antimicrob. Agents Chemother.* *54*, 4269-4274.

- 558 [9] Taylor, H. M., McRobert, L., Grainger, M., Sicard, A., Dluzewski, A. R., Hopp, C. S., Holder,  
559 A. A., and Baker, D. A. (2010) The malaria parasite cyclic GMP-dependent protein kinase  
560 plays a central role in blood-stage schizogony, *Eukaryot. Cell* 9, 37-45.
- 561 [10] Falae, A., Combe, A., Amaladoss, A., Carvalho, T., Menard, R., and Bhanot, P. (2010) Role  
562 of *Plasmodium berghei* cGMP-dependent protein kinase in late liver stage development, *J.*  
563 *Biol. Chem.* 285, 3282-3288.
- 564 [11] Huang, D., Zhou, T., Lafleur, K., Nevado, C., and Caflisch, A. (2010) Kinase selectivity  
565 potential for inhibitors targeting the ATP binding site: a network analysis, *Bioinformatics*  
566 26, 198-204.
- 567 [12] Baker, D. A., Stewart, L. B., Large, J. M., Bowyer, P. W., Ansell, K. H., Jiménez-Díaz, M.  
568 B., El Bakkouri, M., Birchall, K., Dechering, K. J., and Bouloc, N. S. (2017) A potent  
569 series targeting the malarial cGMP-dependent protein kinase clears infection and blocks  
570 transmission, *Nat. Commun.* 8, 1-9.
- 571 [13] Penzo, M., de Las Heras-Dueña, L., Mata-Cantero, L., Diaz-Hernandez, B., Vazquez-Muñiz,  
572 M.-J., Ghidelli-Disse, S., Drewes, G., Fernandez-Alvaro, E., and Baker, D. A. (2019) High-  
573 throughput screening of the *Plasmodium falciparum* cGMP-dependent protein kinase  
574 identified a thiazole scaffold which kills erythrocytic and sexual stage parasites, *Sci. Rep.*  
575 9, 1-13.
- 576 [14] Mahmood, S. U., Cheng, H., Tummalapalli, S. R., Chakrasali, R., Bheemanaboina, R. R. Y.,  
577 Kreiss, T., Chojnowski, A., Eck, T., Siekierka, J. J., and Rotella, D. P. (2020) Discovery  
578 of isoxazolyl-based inhibitors of *Plasmodium falciparum* cGMP-dependent protein kinase,  
579 *Med. Chem. Commun.* 11, 98-101.
- 580 [15] Biftu, T., Feng, D., Ponpipom, M., Girotra, N., Liang, G.-B., Qian, X., Bugianesi, R.,  
581 Simeone, J., Chang, L., and Gurnett, A. (2005) Synthesis and SAR of 2, 3-diarylpyrrole  
582 inhibitors of parasite cGMP-dependent protein kinase as novel anticoccidial agents,  
583 *Bioorg. Med. Chem. Lett.* 15, 3296-3301.
- 584 [16] Sharlow, E. R., Leimgruber, S., Yellow-Duke, A., Barrett, R., Wang, Q. J., and Lazo, J. S.  
585 (2008) Development, validation and implementation of immobilized metal affinity for  
586 phosphochemicals (IMAP)-based high-throughput screening assays for low-molecular-  
587 weight compound libraries, *Nat. Protoc.* 3, 1350-1363.
- 588 [17] El Bakkouri, M., Kouidmi, I., Wernimont, A. K., Amani, M., Hutchinson, A., Loppnau, P.,  
589 Kim, J. J., Flueck, C., Walker, J. R., and Seitova, A. (2019) Structures of the cGMP-  
590 dependent protein kinase in malaria parasites reveal a unique structural relay mechanism  
591 for activation, *Proc. Natl. Acad. Sci. U. S. A.* 116, 14164-14173.
- 592 [18] Jones, G., Willett, P., Glen, R. C., Leach, A. R., and Taylor, R. (1997) Development and  
593 validation of a genetic algorithm for flexible docking, *J. Biol. Chem.* 267, 727-748.
- 594 [19] Molecular Operating Environment (MOE), C. C. G. U., 1010 Sherbooke St. West, Suite #910,  
595 Montreal, QC, Canada, H3A 2R7, 2021.
- 596 [20] Nayeem, A., Sitkoff, D., and Krystek, S., Jr. (2006) A comparative study of available software  
597 for high-accuracy homology modeling: from sequence alignments to structural models,  
598 *Protein Sci* 15, 808-824.
- 599 [21] Butterworth, P. J. (1972) The use of Dixon plots to study enzyme inhibition, *Biochim.*  
600 *Biophys. Acta, Enzymology* 289, 251-253.
- 601 [22] Yung-Chi, C., and Prusoff, W. H. (1973) Relationship between the inhibition constant (KI)  
602 and the concentration of inhibitor which causes 50 per cent inhibition (I50) of an enzymatic  
603 reaction, *Biochem. Pharmacol.* 22, 3099-3108.

- 604 [23] Cheng, H. C. (2001) The power issue: Determination of KB or Ki from IC50: A closer look  
605 at the Cheng–Prusoff equation, the Schild plot and related power equations, *J. Pharmacol.*  
606 *Toxicol. Methods* 46, 61-71.
- 607 [24] Tsagris, D. J., Birchall, K., Bouloc, N., Large, J. M., Merritt, A., Smiljanic-Hurley, E.,  
608 Wheldon, M., Ansell, K. H., Kettleborough, C., and Whalley, D. (2018) Trisubstituted  
609 thiazoles as potent and selective inhibitors of Plasmodium falciparum protein kinase G  
610 (PfPKG), *Bioorganic Med. Chem. Lett.* 28, 3168-3173.
- 611 [25] Vanaerschot, M., Murithi, J. M., Pasaje, C. F. A., Ghidelli-Disse, S., Dwomoh, L., Bird, M.,  
612 Spottiswoode, N., Mittal, N., Arendse, L. B., Owen, E. S., Wicht, K. J., Siciliano, G.,  
613 Bösche, M., Yeo, T., Kumar, T. R. S., Mok, S., Carpenter, E. F., Giddins, M. J., Sanz, O.,  
614 Otilie, S., Alano, P., Chibale, K., Llinás, M., Uhlemann, A.-C., Delves, M., Tobin, A. B.,  
615 Doerig, C., Winzeler, E. A., Lee, M. C. S., Niles, J. C., and Fidock, D. A. (2020) Inhibition  
616 of Resistance-Refractory P. falciparum Kinase PKG Delivers Prophylactic, Blood Stage,  
617 and Transmission-Blocking Antiplasmodial Activity, *Cell Chemical Biology* 27, 806-  
618 816.e808.
- 619 [26] DeLano, W. L. (2002) Pymol: An open-source molecular graphics tool, *CCP4 Newsletter on*  
620 *protein crystallography* 40, 82-92.
- 621 [27] Baker, D. A., Matralis, A. N., Osborne, S. A., Large, J. M., and Penzo, M. (2020) Targeting  
622 the Malaria Parasite cGMP-Dependent Protein Kinase to Develop New Drugs, *Front.*  
623 *Microbiol.* 11, 3189.
- 624 [28] Kim, J. J., Flueck, C., Franz, E., Sanabria-Figueroa, E., Thompson, E., Lorenz, R., Bertinetti,  
625 D., Baker, D. A., Herberg, F. W., and Kim, C. (2015) Crystal structures of the carboxyl  
626 cGMP binding domain of the Plasmodium falciparum cGMP-dependent protein kinase  
627 reveal a novel capping triad crucial for merozoite egress, *PLoS Pathog* 11, e1004639-  
628 e1004639.
- 629 [29] Franz, E., Knape, M. J., and Herberg, F. W. (2018) cGMP Binding Domain D Mediates a  
630 Unique Activation Mechanism in Plasmodium falciparum PKG, *ACS Infectious Diseases*  
631 4, 415-423.
- 632 [30] Byun, J. A., Van, K., Huang, J., Henning, P., Franz, E., Akimoto, M., Herberg, F. W., Kim,  
633 C., and Melacini, G. (2020) Mechanism of allosteric inhibition in the Plasmodium  
634 falciparum cGMP-dependent protein kinase, *Journal of Biological Chemistry* 295, 8480-  
635 8491.
- 636
